# Supplementary material for: One-pot synthesis of porous crystal structured nanosponge-like pristine copper metal–organic framework for hybrid supercapacitor application
Source: Royal Society of Chemistry journal article supplement (doi:10.1039/d2nj02043b), 2022-01-01
Supplement: d2nj02043b1.pdf [file d2nj02043b1.pdf]

## Supporting Information

# One-Pot Synthesis of Porous Crystal Structured Nanosponge-Like Pristine Copper Metal-Organic Framework for Hybrid Supercapacitor Application

R. Balamurugan<sup>a</sup>, S. Siva Shalini<sup>a</sup>, S. Velmathi<sup>b</sup>, and A. Chandra Bose<sup>\*a</sup>

<sup>a</sup>Nanomaterials Laboratory, Department of Physics, National Institute of Technology,  
Tiruchirappalli – 620015, Tamil Nadu, India.

<sup>b</sup>Organic and Polymer Synthesis Laboratory, Department of Chemistry, National Institute of  
Technology, Tiruchirappalli – 620015, Tamil Nadu, India.

\*Corresponding author: [acbose@nitt.edu](mailto:acbose@nitt.edu)

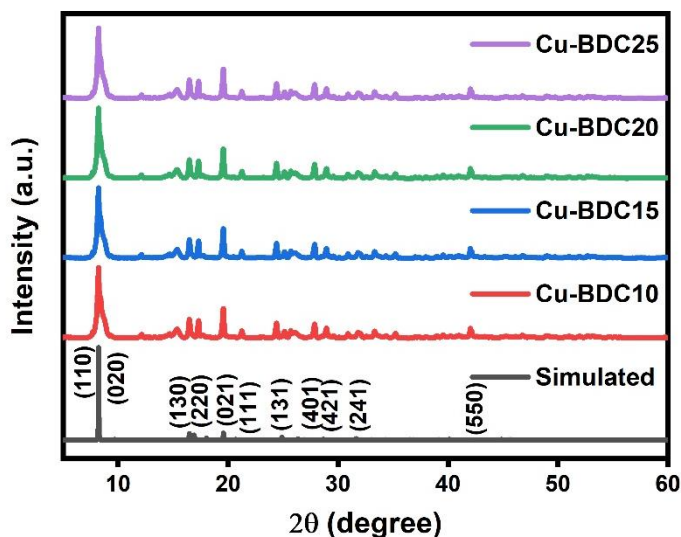

Fig. S1 XRD patterns of simulated, Cu-BDC10, Cu-BDC15, Cu-BDC20, and Cu-BDC25.

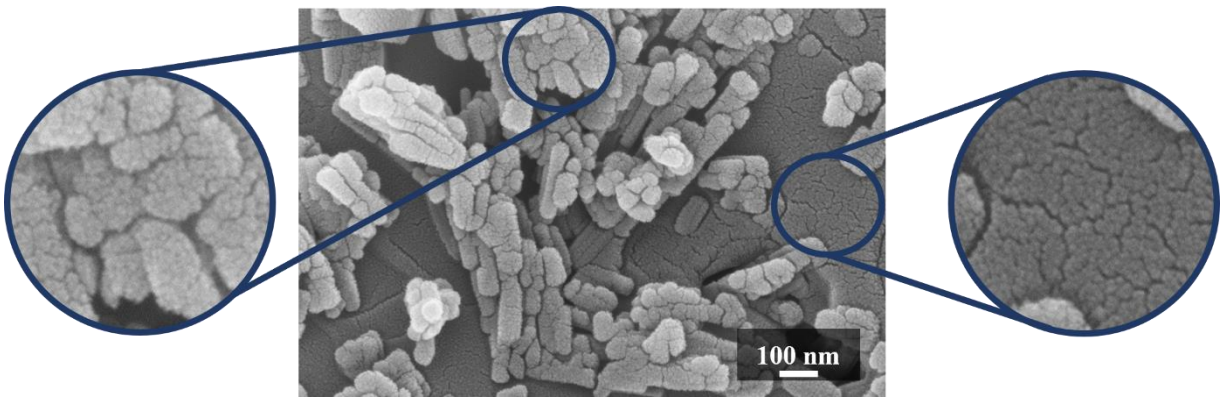

**Fig. S2** FE-SEM image of novel nanosponge-like pristine Cu-BDC20

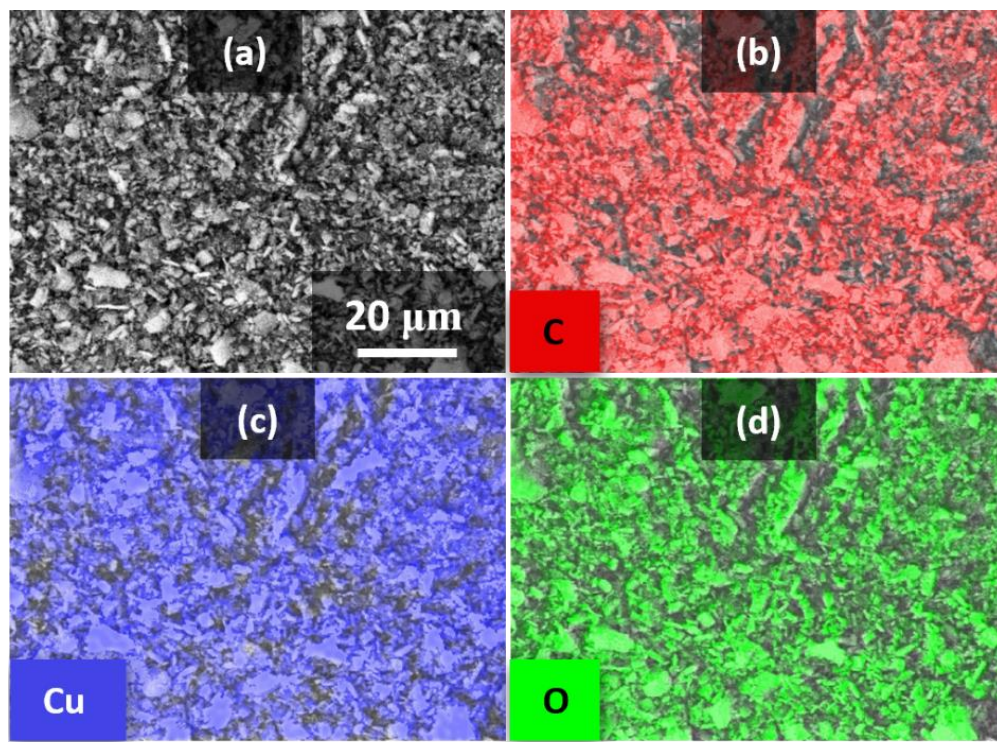

**Fig. S3** (a) FE-SEM images at the magnification of 2500 X, (b) elemental mapping of Cu (blue), (c) C (red), and (d) O (green) of as-prepared Cu-BDC20.

**Table S1** Surface elemental composition of Cu-BDC20 from EDX spectrum

| <b>S.No.</b> | <b>Element</b> | <b>Weight (%)</b> | <b>Atomic (%)</b> |
|--------------|----------------|-------------------|-------------------|
| 1            | Copper         | 24.23             | 6.30              |
| 2            | Oxygen         | 30.63             | 31.63             |
| 3            | Carbon         | 45.13             | 62.07             |

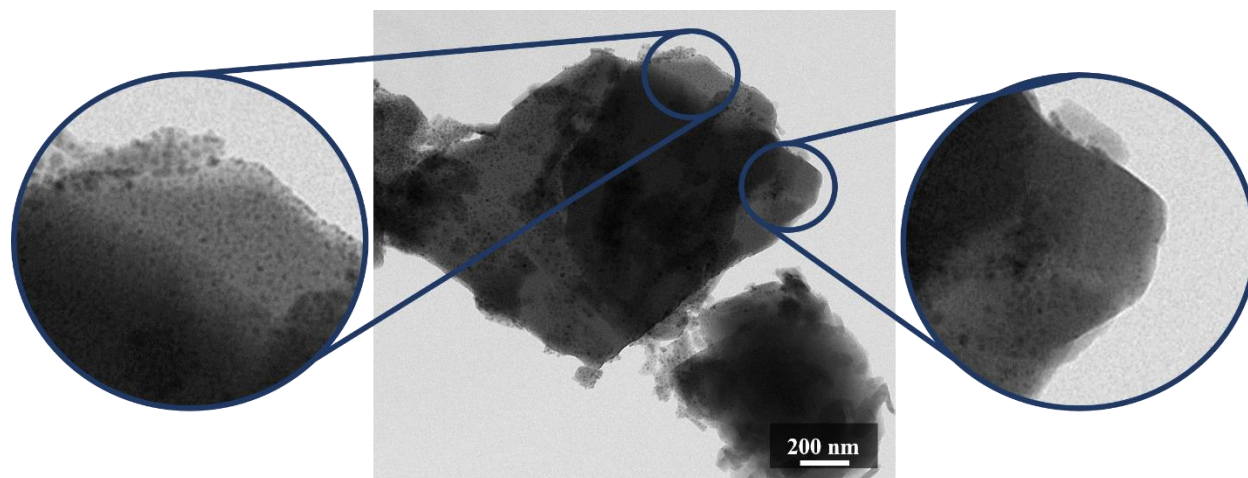

**Fig. S4** TEM image of novel nanosponge-like pristine Cu-BDC20

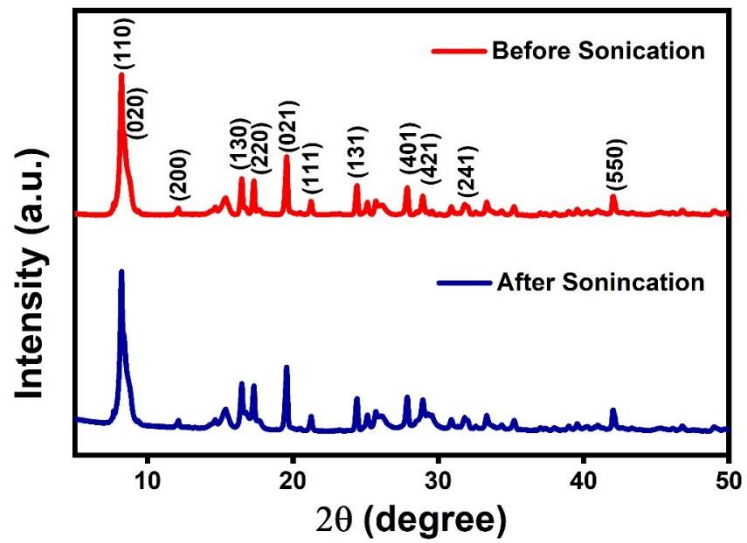

**Fig. S5** The XRD patterns of as-prepared Cu-BDC20 before and after sonication.

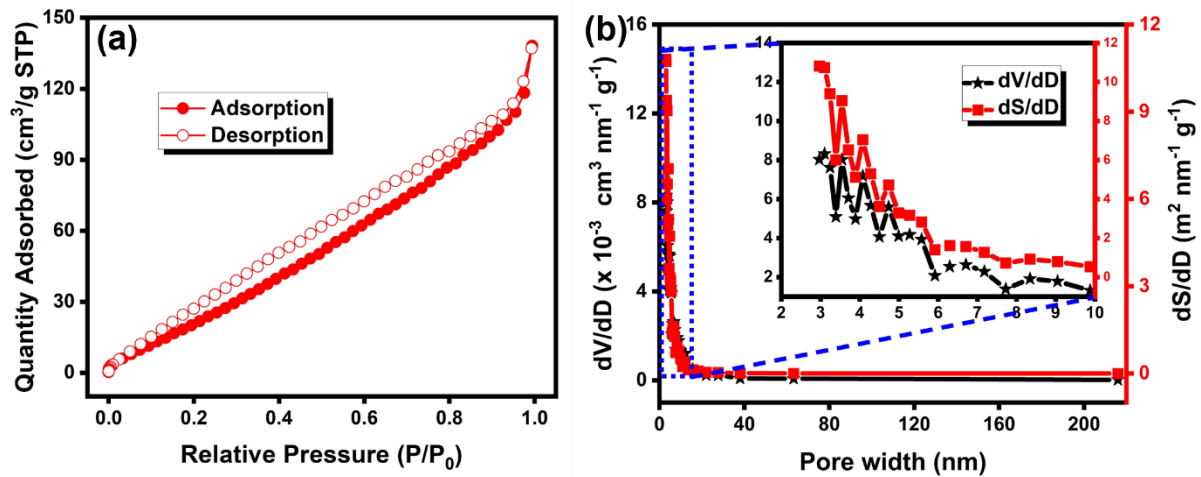

**Fig. S6** (a) Nitrogen gas adsorption-desorption isotherm, and (b) BJH (Barrett–Joyner–Halenda) pore size distribution curve of as-prepared Cu-BDC20.

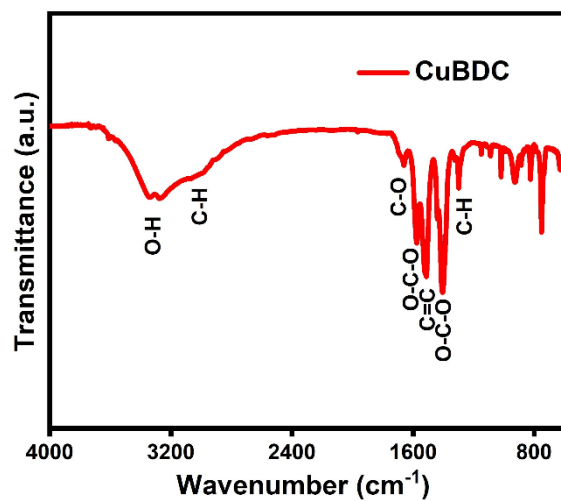

Fig. S7 FTIR spectrum of Cu-BDC20.



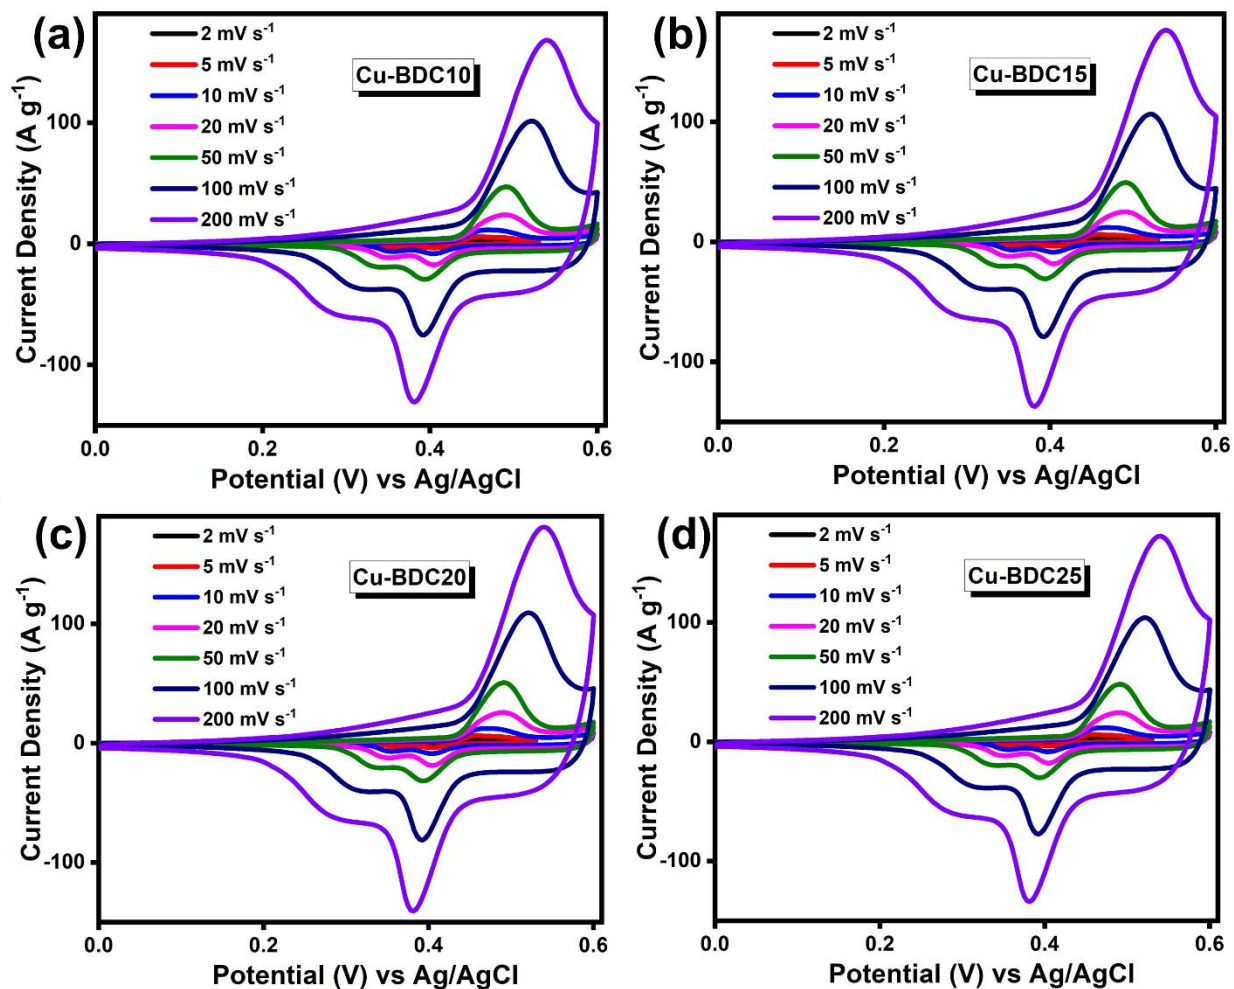

**Fig. S8** CV curves at various scan rate of (a) Cu-BDC10, (b) Cu-BDC15, (c) Cu-BDC20, and (d) Cu-BDC25.

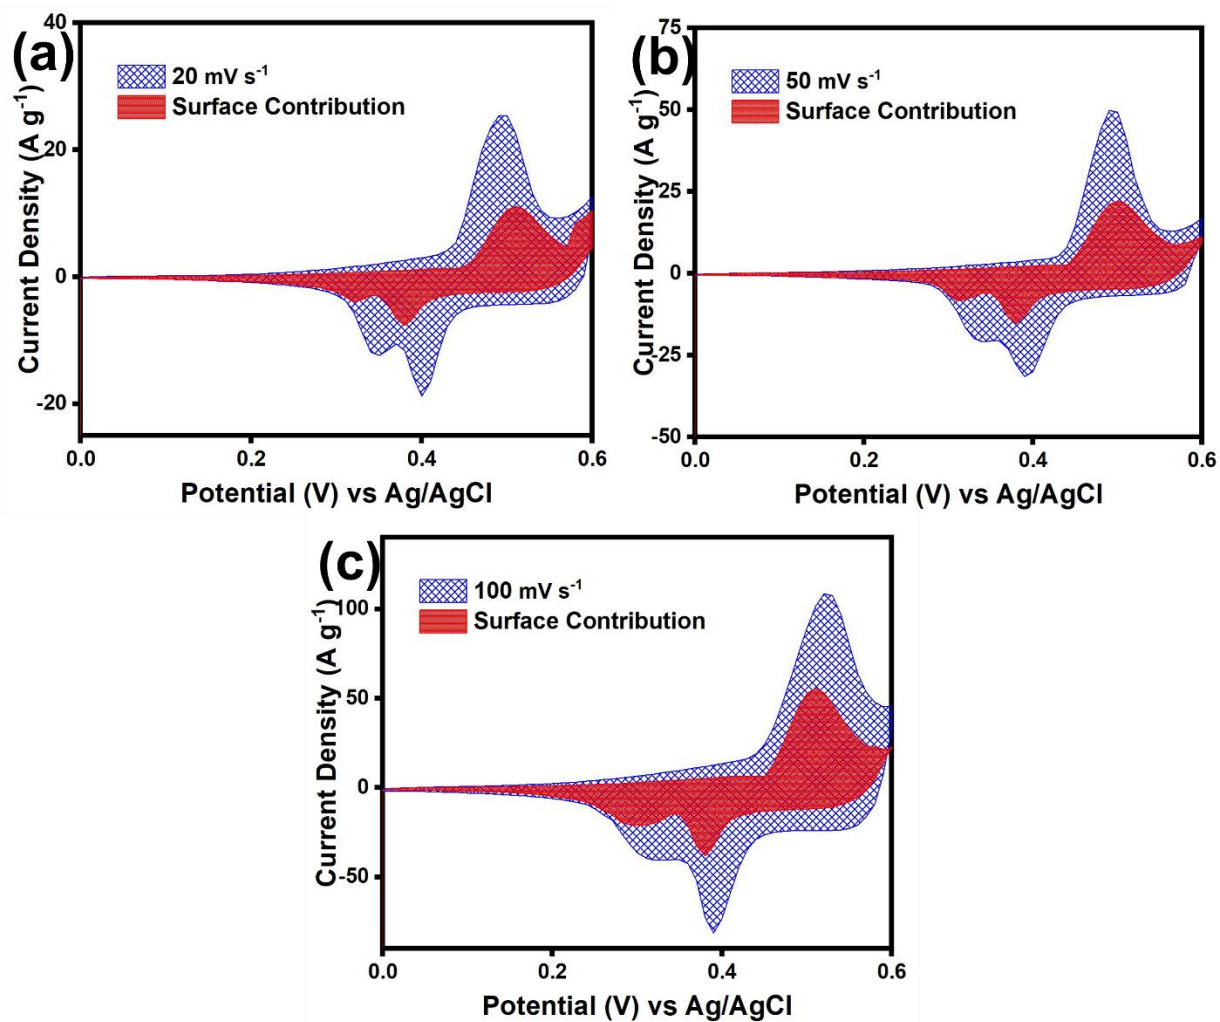

**Fig. S9** Outer surface contribution deconvolution from CV curves of Cu-BDC20@NiF at (a) 20 mV s<sup>-1</sup>, (b) 50 mV s<sup>-1</sup>, and (c) 100 mV s<sup>-1</sup> scan rate.

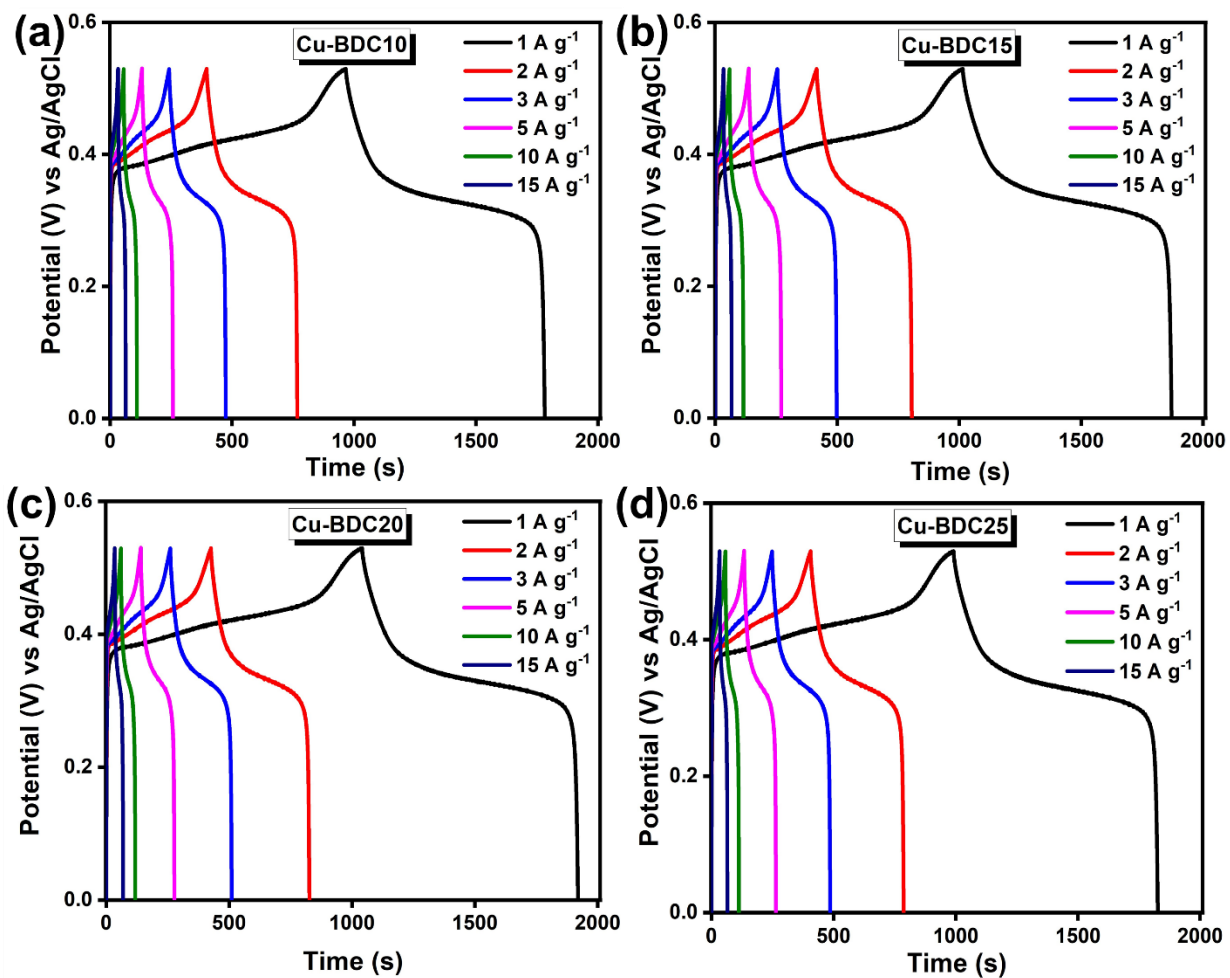

**Fig. S10** GCD curves at various current density of (a) Cu-BDC10, (b) Cu-BDC15, (c) Cu-BDC20, and (d) Cu-BDC25.

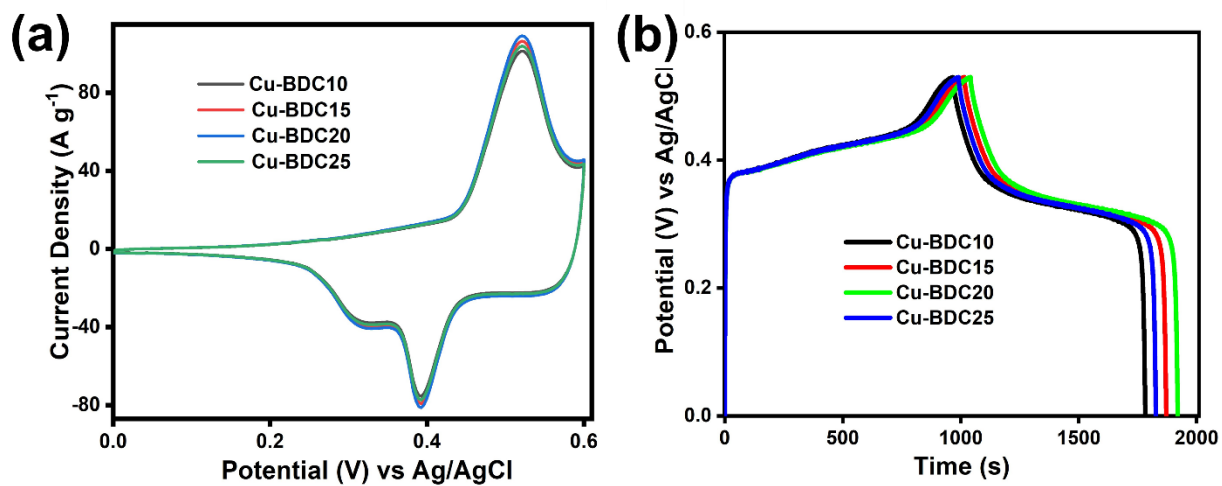

**Fig. S11** Electrochemical measurements (a) CV curves at  $100 \text{ mV s}^{-1}$  and (b) GCD curves at  $1 \text{ A g}^{-1}$  of Cu-BDC10, Cu-BDC15, Cu-BDC20, and Cu-BDC25.

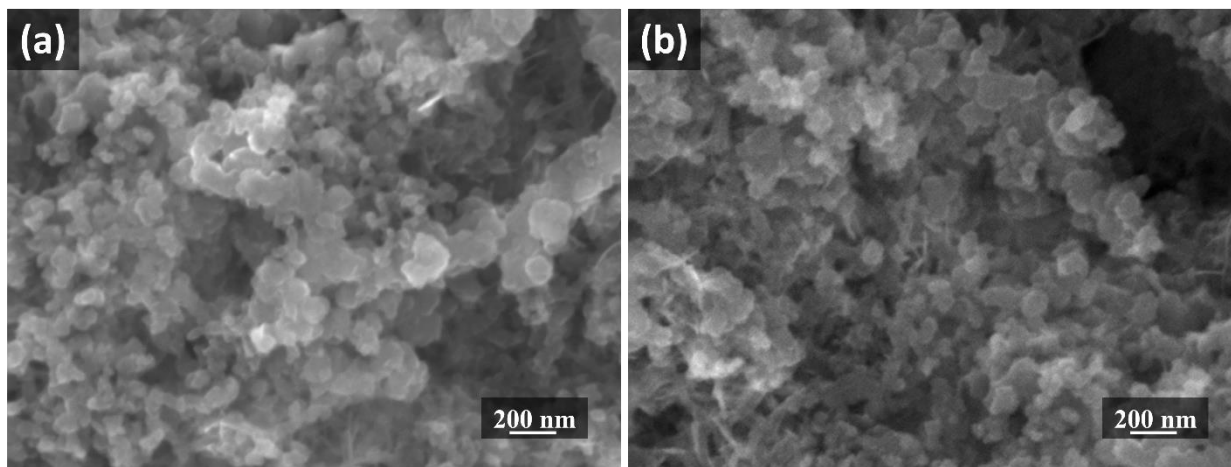

**Fig. S12** FE-SEM images of the Cu-BDC20@NiF (a) before, and (b) after cycle test.
